# Supplementary material for: Reproductive Health Knowledge, Attitude and Practice Among Adolescents Attending Secondary Schools in Asmara, Eritrea
Source: Research Square preprint supplement (doi:10.21203/rs.3.rs-958951/v1), 2021-10-18
Supplement: Supplementary file 1 [file a080ceb7f489e0962ff9397a.docx]

**Table. Association of participants’ knowledge with their demographic characteristics**

| **Variables** |  | **M (SD)** | **t/F value** | ***p*-value** |
| --- | --- | --- | --- | --- |
| **Age** |  |  |  |  |
|  | 14 to 16 | 19.45 (6.12) | 1.98 | **0.048** |
|  | 17 to 19 | 17.60 (5.81) |  |  |
| **Gender** |  |  |  |  |
|  | Male | 19.19 (6.12) | -0.16 | 0.876 |
|  | Female | 19.29 (6.11) |  |  |
| **Grade** |  |  |  |  |
|  | Ninth | 18.34 (6.12) | 7.06 | **0.001** |
|  | Tenth | 18.99 (5.97) |  |  |
|  | Eleventh | 21.06 (5.93) |  |  |
| **Religion** |  |  |  |  |
|  | Christian | 19.25 (6.02) | -0.07 | 0.942 |
|  | Muslim | 19.17 (7.15) |  |  |
| **Ethnicity** |  |  |  |  |
|  | Tigrigna | 19.16 (6.02) | 0.711 | 0.492 |
|  | Tigre | 19.80 96.38) |  |  |
|  | Other* | 21.30 (8.88) |  |  |
| **Grew up with** | |  |  |  |
|  | Father & Mother | 19.11(6.16) | 0.512 | 0.600 |
|  | Mother only | 19.85(6.33) |  |  |
|  | Other** | 20.05(4.75) |  |  |
| **Currently living with** | |  |  |  |
|  | Father & Mother | 19.15(6.12) | 0.369 | 0.692 |
|  | Mother only | 19.20(6.31) |  |  |
|  | Other** | 20.00(5.72) |  |  |

*Other*= Blien, Saho, Afar ethnics; Other**=father, sister, brother, relatives.*
